# Supplementary material for: Critical assessment of alignment procedures for LC-MS proteomics and metabolomics measurements
Source: PubMed Central journal article supplement (PMC2570366; doi:10.1186/1471-2105-9-375), 2008-09-15
Supplement: 1471-2105-9-375-S1.pdf [file 1471-2105-9-375-S1.pdf]

Additional File 1  
for  
*Critical assessment of alignment procedures for LC-MS  
proteomics and metabolomics measurements*  
by  
Eva Lange, Ralf Tautenhahn, Steffen Neumann, and  
Clemens Gröpl  
2008-06-18

Retention time deviations of data set P1

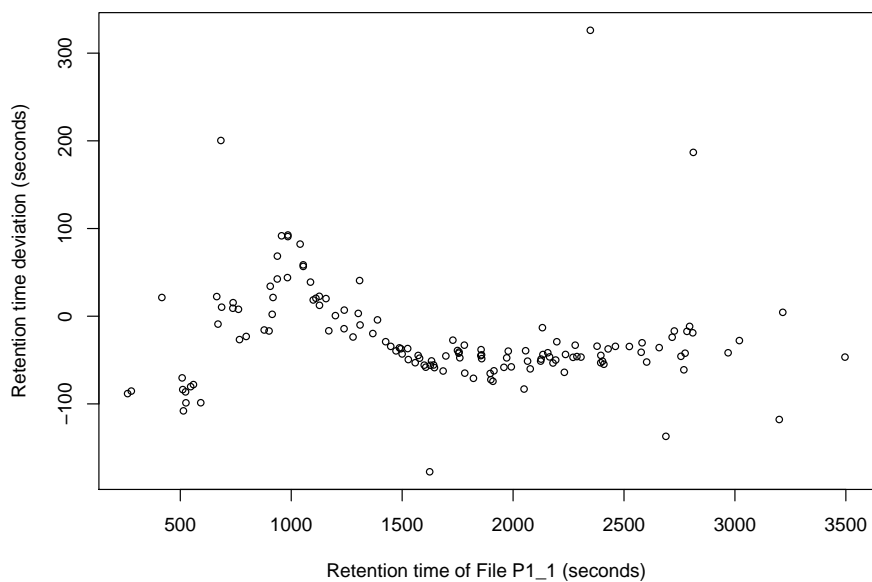

Figure 1: Ground truth: Retention time deviation of File P1.2 plotted against retention time of File P1.1 (fraction 00)

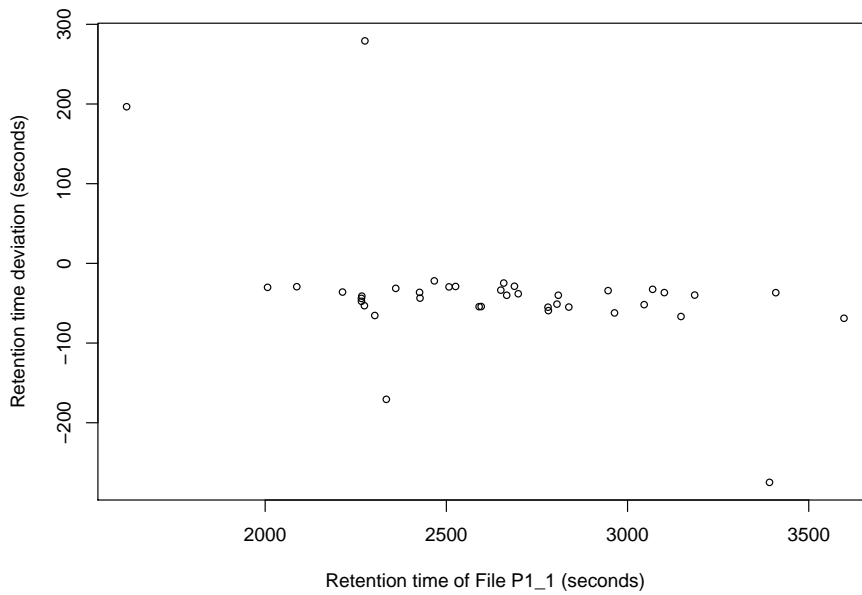

Figure 2: Ground truth: Retention time deviation of File P1.2 plotted against retention time of File P1.1 (fraction 20)

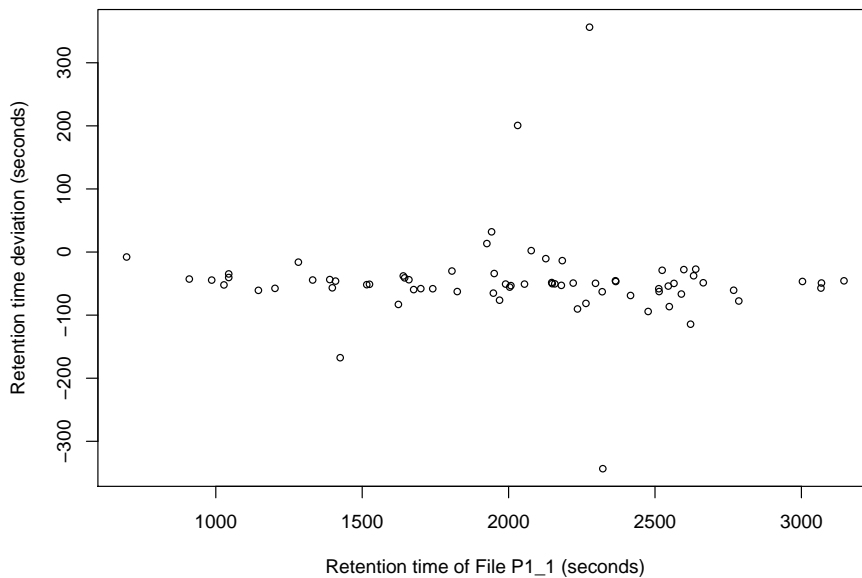

Figure 3: Ground truth: Retention time deviation of File P1.2 plotted against retention time of File P1.1 (fraction 40)

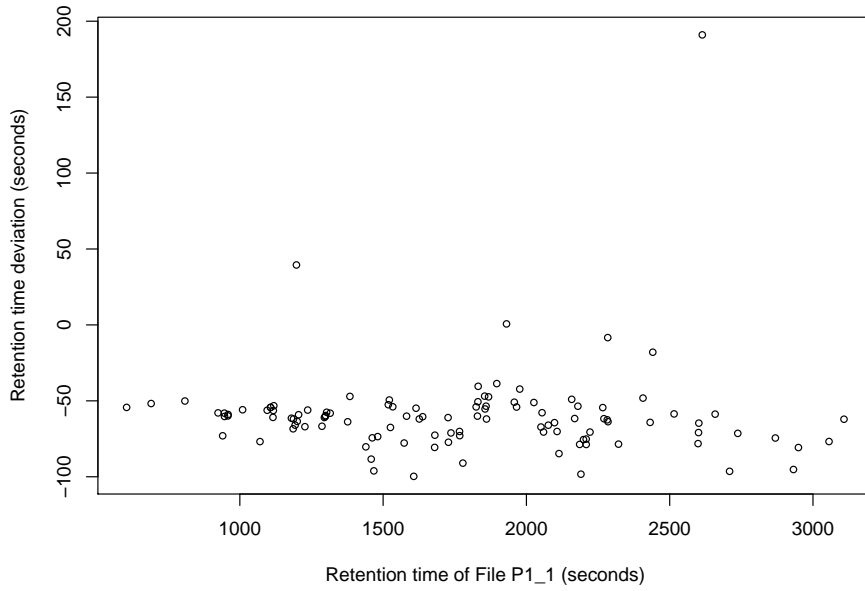

Figure 4: Ground truth: Retention time deviation of File P1.2 plotted against retention time of File P1.1 (fraction 60)

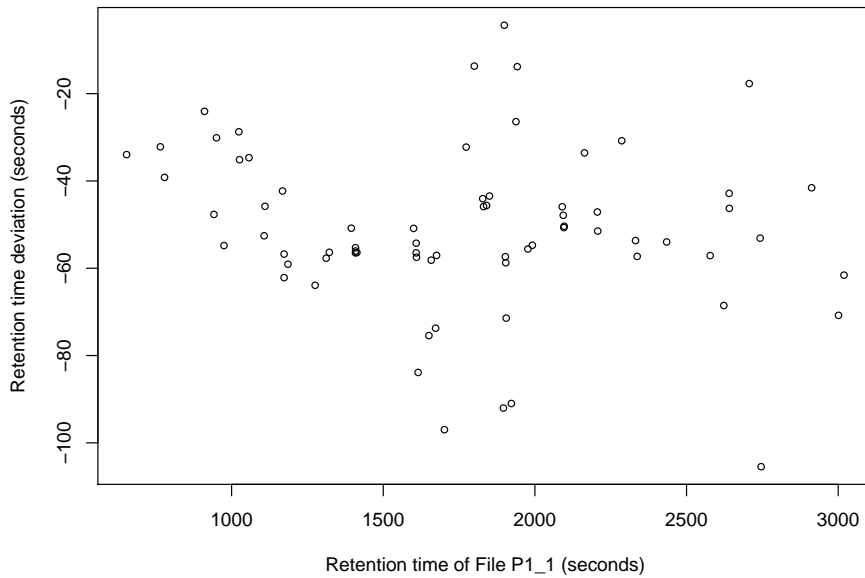

Figure 5: Ground truth: Retention time deviation of File P1.2 plotted against retention time of File P1.1 (fraction 80)

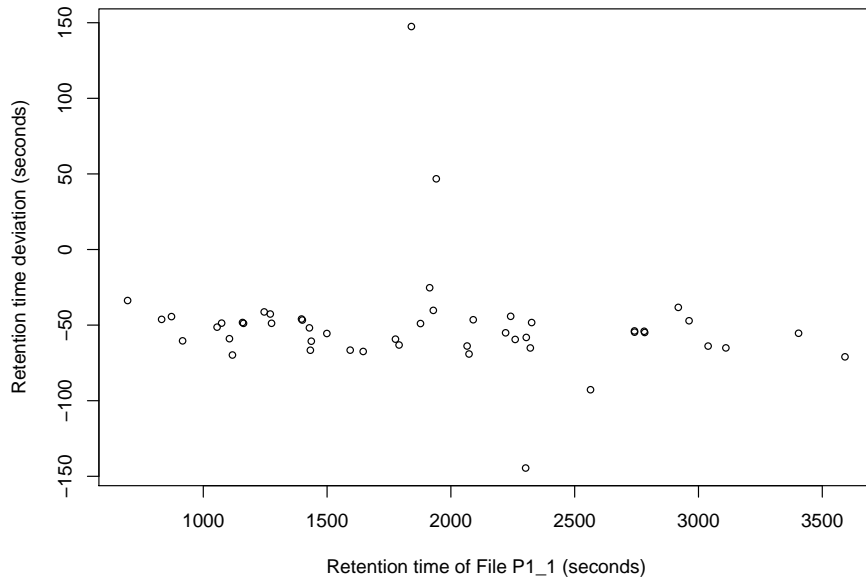

Figure 6: Ground truth: Retention time deviation of File P1.2 plotted against retention time of File P1.1 (fraction 100)

## 0.1 Retention time deviations of data set P2

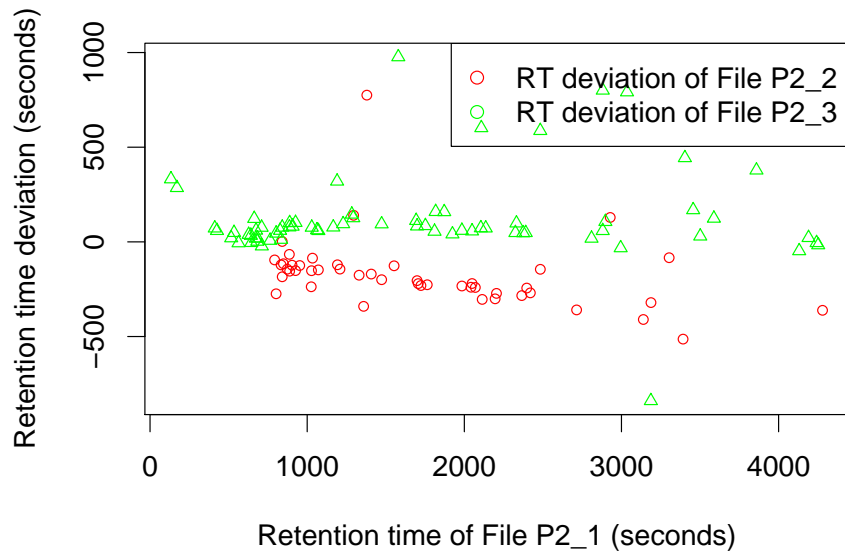

Figure 7: Ground truth: Retention time deviations of File P2.2 and P2.3 plotted against retention time of File P2.1 (fraction 00)

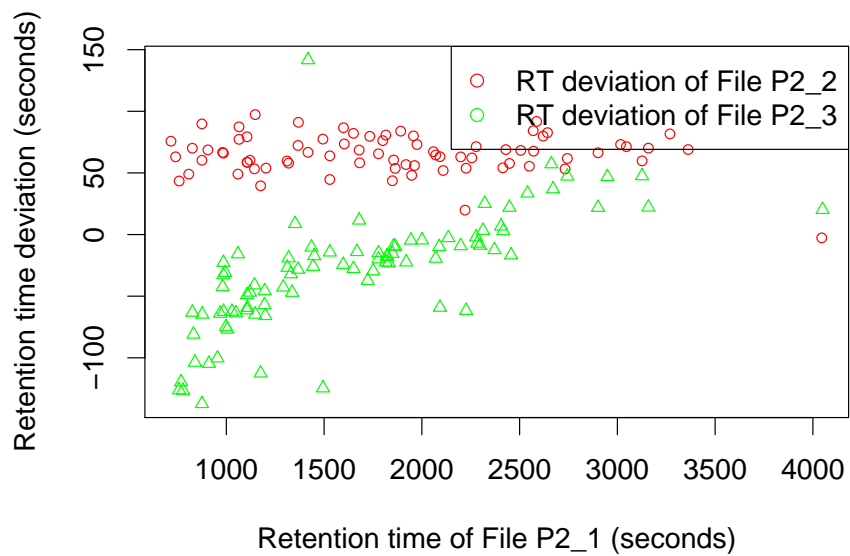

Figure 8: Ground truth: Retention time deviations of File P2.2 and P2.3 plotted against retention time of File P2.1 (fraction 20)

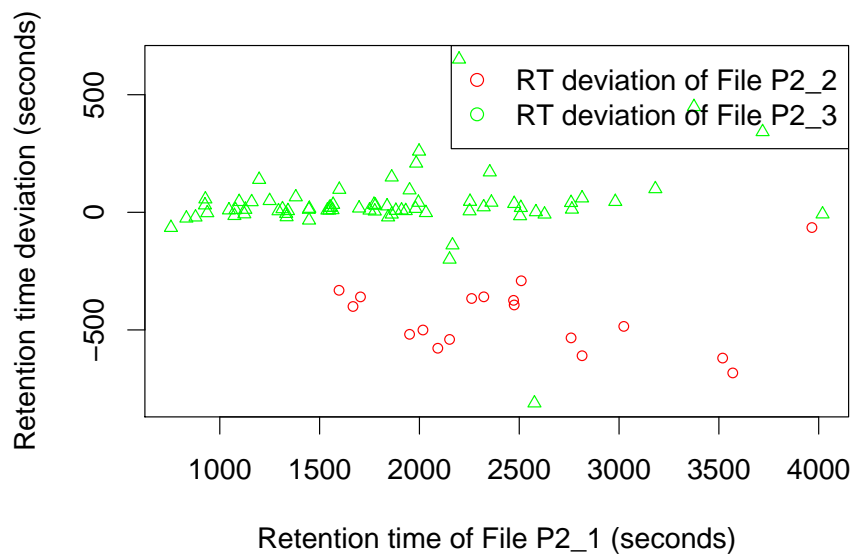

Figure 9: Ground truth: Retention time deviations of File P2.2 and P2.3 plotted against retention time of File P2.1 (fraction 40)

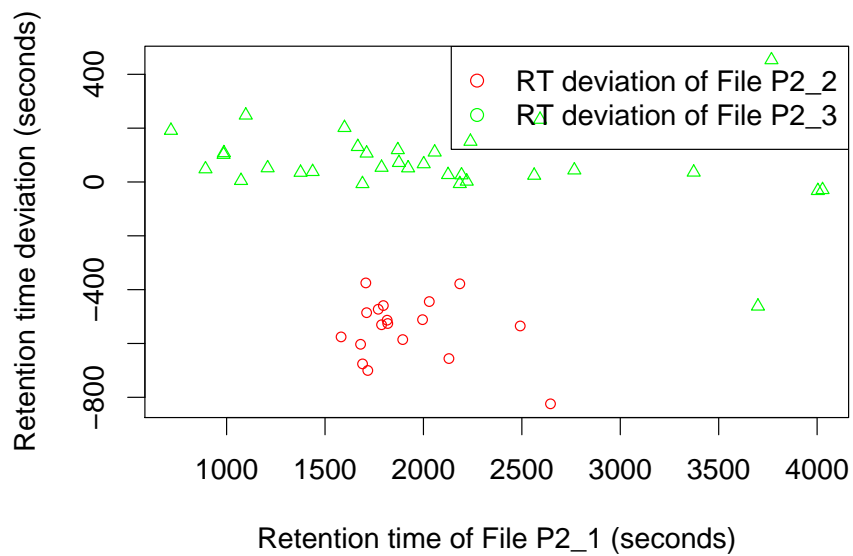

Figure 10: Ground truth: Retention time deviations of File P2.2 and P2.3 plotted against retention time of File P2.1 (fraction 80)

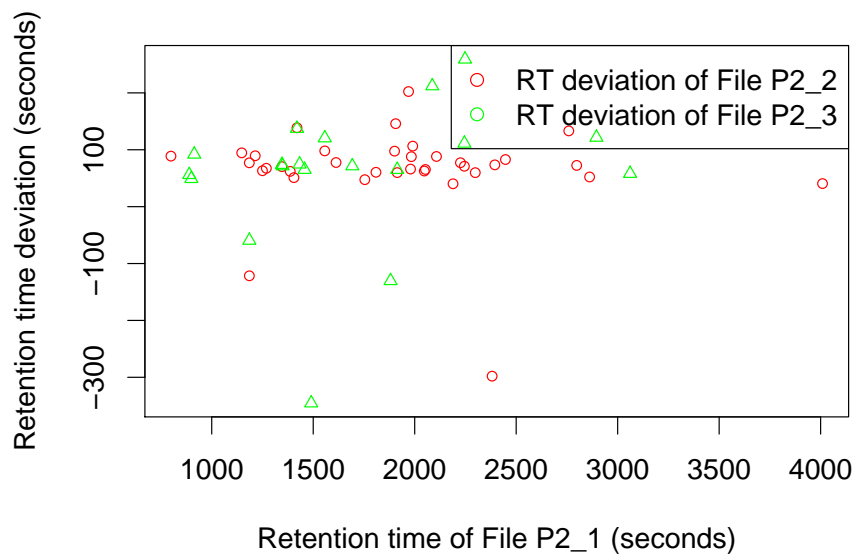

Figure 11: Ground truth: Retention time deviations of File P2.2 and P2.3 plotted against retention time of File P2.1 (fraction 100)

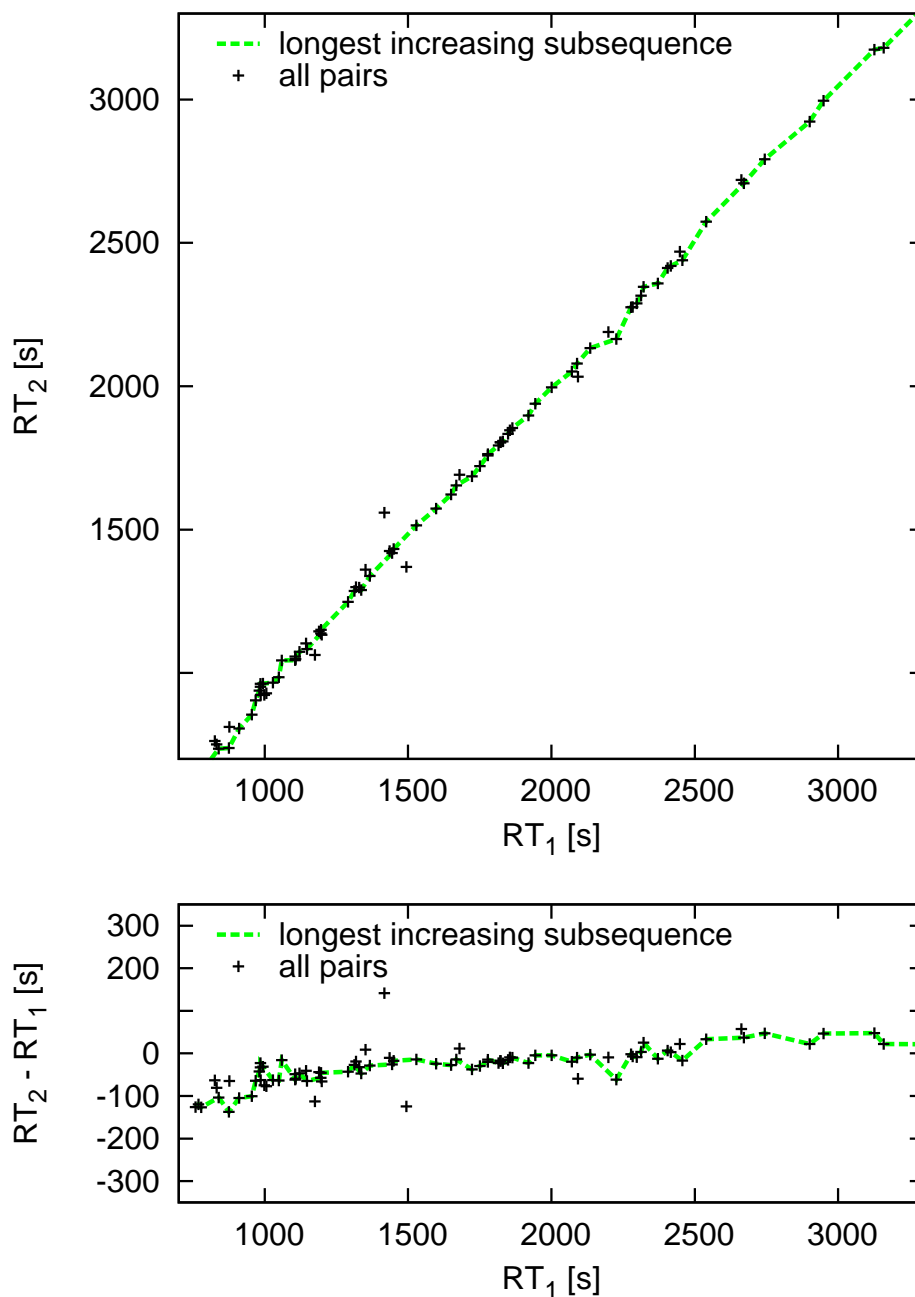

Figure 12: Ground truth: The figure shows the retention times of features in File P2.1 and File P2.3 (fraction 20). These features are matched in the ground truth. Also shown is a longest increasing subsequence that contains the maximum number of feature pairs that can be aligned without changing the elution order within each map. At most 66 of the 88 pairs can be aligned without elution order changes. The longest increasing subsequence was computed using SeqAn (<http://www.seqan.de>).
